# Supplementary material for: Identification of a novel mutation in the mechanoreceptor-encoding gene CXCR1 in patients with keloid
Source: PubMed Central journal article supplement (PMC6096561; doi:10.1007/s00403-018-1847-3), 2018-06-21
Supplement: 403_2018_1847_MOESM1_ESM.pdf [file 403_2018_1847_MOESM1_ESM.pdf]

Table S1. Basic information of subjects

| Subjects   | Gender | Age<br>(Years old) | Location  | Samples          | Isolation | Application            | Tension |
|------------|--------|--------------------|-----------|------------------|-----------|------------------------|---------|
| patient 1  | male   | 25                 | chest     | peripheral blood | DNA       | mutation analysis      | –       |
| patient 2  | male   | 35                 | chest     | peripheral blood | DNA       | mutation analysis      | –       |
| patient 3  | female | 29                 | chest     | peripheral blood | DNA       | mutation analysis      | –       |
| patient 4  | female | 18                 | back      | peripheral blood | DNA       | mutation analysis      | –       |
| patient 5  | male   | 19                 | chest     | skin tissue      | RNA       | gene screening by qPCR | high    |
| patient 6  | female | 26                 | chest     | skin tissue      | RNA       | gene screening by qPCR | high    |
| patient 7  | male   | 34                 | chest     | skin tissue      | RNA       | gene screening by qPCR | high    |
| patient 8  | female | 29                 | back      | skin tissue      | RNA       | gene screening by qPCR | high    |
| patient 9  | male   | 33                 | back      | skin tissue      | RNA       | gene screening by qPCR | high    |
| patient 10 | female | 41                 | back      | skin tissue      | RNA       | gene screening by qPCR | high    |
| patient 11 | male   | 19                 | chest     | skin tissue      | RNA       | RNA-seq                | –       |
| patient 12 | male   | 34                 | back      | skin tissue      | RNA       | RNA-seq                | –       |
| patient 13 | female | 35                 | auricle   | skin tissue      | RNA       | RNA-seq                | –       |
| control 1  | female | 17                 | scalp     | skin tissue      | RNA       | gene screening by qPCR | middle  |
| control 2  | male   | 28                 | arm       | skin tissue      | RNA       | gene screening by qPCR | middle  |
| control 3  | female | 25                 | arm       | skin tissue      | RNA       | gene screening by qPCR | middle  |
| control 4  | female | 16                 | arm       | skin tissue      | RNA       | gene screening by qPCR | middle  |
| control 5  | male   | 34                 | neck      | skin tissue      | RNA       | gene screening by qPCR | middle  |
| control 6  | female | 29                 | lower leg | skin tissue      | RNA       | gene screening by qPCR | middle  |
| control 7  | male   | 8                  | prepuce   | skin tissue      | RNA       | gene screening by qPCR | low     |
| control 8  | male   | 11                 | prepuce   | skin tissue      | RNA       | gene screening by qPCR | low     |
| control 9  | male   | 13                 | prepuce   | skin tissue      | RNA       | gene screening by qPCR | low     |
| control 10 | male   | 9                  | prepuce   | skin tissue      | RNA       | gene screening by qPCR | low     |
| control 11 | male   | 18                 | prepuce   | skin tissue      | RNA       | gene screening by qPCR | low     |
| control 12 | male   | 21                 | prepuce   | skin tissue      | RNA       | gene screening by qPCR | low     |

**Article title:** Identification of a novel mutation in the mechanoreceptor-encoding gene CXCR1 in patients with keloid

**Journal name:** Archives of Dermatological Research

**Author names:** Qiguo Zhang, Liangqi Cai, Mian Wang, Xiaoping Ke, Xiaoyan Zhao, Yijin Huang

**Affiliation:** The First Affiliated Hospital of Xiamen University

**e-mail address of the corresponding author:** [zqgdreamer@163.com](mailto:zqgdreamer@163.com); [h8883697@126.com](mailto:h8883697@126.com)

Table S2. List of primers used for qPCR screening of RNAseq data of select genes

| Gene    | Forward/Reverse | Sequence                | Amplicon Size (bp) | Primer Bank ID |
|---------|-----------------|-------------------------|--------------------|----------------|
| ITGA2   | forward         | CCTACAATGTTGGTCTCCCAGA  | 106                | 116295257c1    |
|         | reverse         | AGTAACCAGTTGCCTTTTGGATT |                    |                |
| ITGB1   | forward         | CCTACTTCTGCACGATGTGATG  | 128                | 182507160c1    |
|         | reverse         | CCTTTGCTACGGTTGGTTACATT |                    |                |
| LRP5    | forward         | ACTCGCTGTGAGGAGGACAAT   | 82                 | 119709831c1    |
|         | reverse         | GGCAGGCGCATGTGTAGAA     |                    |                |
| FZD4    | forward         | CCTCGGCTACAACGTGACC     | 155                | 333609263c1    |
|         | reverse         | TGCACATTGGCACATAAACAGA  |                    |                |
| FZD7    | forward         | GTGCCAACGGCCTGATGTA     | 111                | 4503832c1      |
|         | reverse         | AGGTGAGAACGGTAAAGAGCG   |                    |                |
| TGFBRII | forward         | GTAGCTCTGATGAGTGCAATGAC | 132                | 133908633c1    |
|         | reverse         | CAGATATGGCAACTCCCAGTG   |                    |                |
| CXCR1   | forward         | CTGACCCAGAAGCGTCACTTG   | 139                | 29171679c1     |
|         | reverse         | CCAGGACCTCATAGCAAACCTG  |                    |                |
| CXCR2   | forward         | CCTGTCTTACTTTTCCGAAGGAC | 82                 | 269973857c1    |
|         | reverse         | TTGCTGTATTGTTGCCCATGT   |                    |                |
| TGFBRI  | forward         | ACGGCGTTACAGTGTCTTG     | 167                | 195963411c1    |
|         | reverse         | GCACATACAAACGGCCTATCTC  |                    |                |
| RFTN1   | forward         | ATGGGTTGCGGATTGAACAAG   | 118                | 41872576c1     |
|         | reverse         | AGCGGTATTCATAGGACACATCT |                    |                |
| TNFR1   | forward         | TGCTGTACCAAGTGCCACAA    | 80                 | self-designed  |
|         | reverse         | CACTCCCTGCAGTCCGTATC    |                    |                |
| FGF5    | forward         | CACTGATAGGAACCTAGAGGC   | 196                | 73486656c1     |
|         | reverse         | CAGATGGAAACCGATGCCC     |                    |                |

**Article title:** Identification of a novel mutation in the mechanoreceptor-encoding gene CXCR1 in patients with keloid

**Journal name:** Archives of Dermatological Research

**Author names:** Qiguo Zhang, Liangqi Cai, Mian Wang, Xiaoping Ke, Xiaoyan Zhao, Yijin Huang

**Affiliation:** The First Affiliated Hospital of Xiamen University

**e-mail address of the corresponding author:** [zqgdreamer@163.com](mailto:zqgdreamer@163.com); [h8883697@126.com](mailto:h8883697@126.com)

Table S3. List of primers used for gene mutation analysis

| Primer name | Primer sequence(5' -3')  |
|-------------|--------------------------|
| CXCR1-a-F   | TGAATCCGAGCTACTAAATCACA  |
| CXCR1-a-R   | AAAATCCAGCCATTACCTTG     |
| CXCR1-b-F   | GCCTTGGCCGACCTACTCTT     |
| CXCR1-b-R   | CGAAAATTTTGGCCGATGAA     |
| CXCR1-c-F   | CGCTGTTTGTTCATGCTGTTC    |
| CXCR1-c-R   | CCTCCACACACAACCTCAG      |
| CXCR2-a-F   | CCTTCATCTCTTCTATAGGTCAGG |
| CXCR2-a-R   | ACAGGAATGTGCCAAAATC      |
| CXCR2-b-F   | CGACCTACTCTTTGCCCTG      |
| CXCR2-b-R   | TGAGGACGACAGCAAAGATG     |
| CXCR2-c-F   | CCTGCGTACGCTGTTTAAGG     |
| CXCR2-c-R   | GGACATGAGGCTTGAATGT      |

**Article title:** Identification of a novel mutation in the mechanoreceptor-encoding gene CXCR1 in patients with keloid

**Journal name:** Archives of Dermatological Research

**Author names:** Qiguo Zhang, Liangqi Cai, Mian Wang, Xiaoping Ke, Xiaoyan Zhao, Yijin Huang

**Affiliation:** The First Affiliated Hospital of Xiamen University

**e-mail address of the corresponding author:** [zqdreamer@163.com](mailto:zqdreamer@163.com); [h8883697@126.com](mailto:h8883697@126.com)

Table S4. Description of antibodies used for IHC imaging of CXCR1

| Protein | Antibody              | Vendor | Cat#    | Dilution |
|---------|-----------------------|--------|---------|----------|
| CXCR1   | rabbit polyclonal IgG | Abcam  | ab85103 | 1:100    |

**Article title:** Identification of a novel mutation in the mechanoreceptor-encoding gene CXCR1 in patients with keloid

**Journal name:** Archives of Dermatological Research

**Author names:** Qiguo Zhang, Liangqi Cai, Mian Wang, Xiaoping Ke, Xiaoyan Zhao, Yijin Huang

**Affiliation:** The First Affiliated Hospital of Xiamen University

**e-mail address of the corresponding author:** [zqgdreamer@163.com](mailto:zqgdreamer@163.com); [h8883697@126.com](mailto:h8883697@126.com)
